# Supplementary material for: Contralateral Liver Hypertrophy and Oncological Outcome Following Radioembolization with 90Y-Microspheres: A Systematic Review
Source: PubMed Central journal article supplement (PMC7072354; doi:10.3390/cancers12020294), 2020-01-27
Supplement: cancers-12-00294-s001.pdf [file cancers-12-00294-s001.pdf]

**Table S1.** Quality assessment of studies according to MINORS score.

| Author and year, study design                       | Aim of the study                                                                                                     | Inclusion of consecutive patients               | Prospective collection of data | Endpoint appropriate to the study aim                                                                                                      | Unbiased evaluation of endpoints                                                                                                 | F/U period appropriate to the major endpoint                | Loss to F/U not exceeding 5%                | Sample calculation | Score |
|-----------------------------------------------------|----------------------------------------------------------------------------------------------------------------------|-------------------------------------------------|--------------------------------|--------------------------------------------------------------------------------------------------------------------------------------------|----------------------------------------------------------------------------------------------------------------------------------|-------------------------------------------------------------|---------------------------------------------|--------------------|-------|
| Edeline 2013, retrospective cohort study [21]       | Evaluation of RE-induced liver volume changes on consecutive HCC with underlying cirrhosis (n = 26)                  | 2<br>Definitive inclusion criteria were present | 0<br>Not reported              | 2<br>Volume measurements as absolute (median, IQR) and relative increase (mean, 95%CI)                                                     | 0<br>Operator bias: single operator<br>Outcome bias (no information about volumetric assessment)<br>Selection bias               | 2<br>Evaluation at approximately 3 months seems appropriate | 2<br>All patients were evaluated            | 0<br>Not reported  | 10/16 |
| Fernandez-Ros 2014, retrospective cohort study [22] | Evaluation of RE-induced volume effects on the liver and spleen in primary and secondary liver malignancies (n = 83) | 2<br>Definitive inclusion criteria were present | 0<br>Not reported              | 2<br>Volume measurement as absolute (mean, SD) and relative increase (mean, SD)<br>Number of resected patients available                   | 0<br>Operator bias: two radiologists<br>Outcome bias (no information about volumetric assessment)<br>Selection bias              | 1<br>Time intervals are inconsistent: 4–8, 10–26 and >26    | 0<br>Unknown number of patients lost to F/U | 0<br>Not reported  | 7/16  |
| Gaba 2009, retrospective cohort study [15]          | Evaluation of RE-induced volume effects on the liver in primary liver malignancies (n = 20)                          | 2<br>Definitive inclusion criteria were present | 0<br>Not reported              | 2<br>Volume measurements as absolute (median, 95%CI, range) and relative increase (median, 95%CI)<br>Number of resected patients available | 0<br>Operator bias (no information about operator)<br>Outcome bias: Technique of image assessment was reported<br>Selection bias | 1<br>Time intervals are extreme: 2–49 months                | 2<br>All patients were evaluated            | 0<br>Not reported  | 9/16  |
| Gabr 2018, Retrospective cohort study [34]          | Evaluation of short- and long-term outcomes of                                                                       | 2<br>Definitive inclusion                       | 0<br>Not reported              | 2<br>Outcome of resected patients available                                                                                                | 0<br>Operator bias (no information about operator)                                                                               | 2<br>Evaluation at approximately                            | 2<br>All patients were evaluated            | 0<br>Not reported  | 10/16 |

|                                                        |                                                                                                                                                  |                                            |                   |                                                                                             |                                                                                                                                         |                                                                   |                                                       |                   |                 |  |
|--------------------------------------------------------|--------------------------------------------------------------------------------------------------------------------------------------------------|--------------------------------------------|-------------------|---------------------------------------------------------------------------------------------|-----------------------------------------------------------------------------------------------------------------------------------------|-------------------------------------------------------------------|-------------------------------------------------------|-------------------|-----------------|--|
|                                                        | patients with HCC who underwent hepatic resection following RE                                                                                   | criteria were present                      |                   | Secondary Endpoint: Volume measurement as relative increase (median, IQR)                   | Outcome bias: No information of excluded patients (n = 91)<br>Selection bias                                                            | 3 months seems appropriate                                        |                                                       |                   |                 |  |
|                                                        | 2                                                                                                                                                |                                            |                   | 2                                                                                           | 0                                                                                                                                       |                                                                   |                                                       |                   |                 |  |
| Garlipp 2014, retrospective matched-pair analysis [23] | Comparison between PVE-induced and RE-induced volume effects on the contralateral liver lobe in secondary liver malignancies (n = 26 vs. n = 26) | Definitive inclusion criteria were present | 0<br>Not reported | Volume measurements as absolute (mean, median, SD) and relative increase (mean, median, SD) | Operator bias (no information about operator)<br>Outcome bias: Technique of image assessment was reported<br>Selection bias             | 2<br>Evaluation at 6 weeks after SIRT seems appropriate           | 2<br>All patients were evaluated                      | 0<br>Not reported | 10/16 (16/24) * |  |
|                                                        | 2                                                                                                                                                |                                            |                   | 2                                                                                           | 0                                                                                                                                       |                                                                   |                                                       |                   |                 |  |
| Goebel 2017, Retrospective cohort study [24]           | Evaluation of RE-induced volume effects on the liver and predictive parameters for contralateral liver lobe hypertrophy in HCC (n = 75)          | Definitive inclusion criteria were present | 0<br>Not reported | Volume measurements as absolute (mean, SD, range) and relative increase (mean, SD, range)   | Operator bias: one experienced radiologist<br>Outcome bias: Technique of image assessment was reported<br>Selection bias                | 2<br>Evaluation at 1, 3 and 6 months after SIRT seems appropriate | 1<br>n = 14 patients were lost to F/U after 6 months. | 0<br>Not reported | 9/16            |  |
|                                                        | 2                                                                                                                                                |                                            |                   | 2                                                                                           | 0                                                                                                                                       |                                                                   |                                                       |                   |                 |  |
| Jakobs 2008, Retrospective cohort study [14]           | Evaluation of RE-induced morphologic changes (namely fibrosis, portal hypertension and volume effects) in secondary liver malignancies (n = 32)  | Definitive inclusion criteria were present | 0<br>Not reported | Volume measurements as relative (mean, median) increase                                     | Operator bias: two radiologists with different experience<br>Outcome bias: Technique of image assessment was reported<br>Selection bias | 2<br>Evaluation at 4 weeks seems appropriate                      | 2<br>All patients were evaluated                      | 0<br>Not reported | 10/16           |  |
|                                                        | 2                                                                                                                                                |                                            |                   | 2                                                                                           | 0                                                                                                                                       |                                                                   |                                                       |                   |                 |  |
| Justinger 2015,                                        |                                                                                                                                                  |                                            | 1                 | 2                                                                                           | 0                                                                                                                                       | 2                                                                 | 2                                                     | 0<br>Not reported | 9/16            |  |

|                                                   |                                                                                                                                                                    |                                                     |                                                          |                                                                                                                                   |                                                                                                                                                                                               |                                                                                                                                                         |                                      |                       |       |
|---------------------------------------------------|--------------------------------------------------------------------------------------------------------------------------------------------------------------------|-----------------------------------------------------|----------------------------------------------------------|-----------------------------------------------------------------------------------------------------------------------------------|-----------------------------------------------------------------------------------------------------------------------------------------------------------------------------------------------|---------------------------------------------------------------------------------------------------------------------------------------------------------|--------------------------------------|-----------------------|-------|
| Retrospective clinical series [25]                | Evaluation of RE-induced secondary surgery in marginally resectable secondary liver malignancies (n = 13)                                                          | No further specified inclusion criteria             | Prospective database with 127 items (no further details) | Number of resected patients available<br><br>Secondary Endpoint: Volume measurements as relative (mean, SD) increase              | Outcome/Operator bias (no information of technique of image assessment or operator)<br><br>Selection/Reporting bias due to clinical series                                                    | Evaluation of liver volume at 2 months and median F/U 26 months (1–54 months) seems appropriate                                                         | All patients were evaluated          |                       |       |
|                                                   | 2                                                                                                                                                                  |                                                     |                                                          | 0                                                                                                                                 |                                                                                                                                                                                               | 2                                                                                                                                                       |                                      |                       |       |
| Lewandowski 2016, Retrospective cohort study [26] | Evaluation of RE-induced secondary surgery in marginally resectable primary and secondary liver malignancies (n = 13)                                              | 2<br><br>Definitive inclusion criteria were present | 1<br><br>Prospective database (no further details)       | 2<br><br>Number of resected patients available<br><br>Secondary Endpoint: Volume measurement as relative increase (median, range) | Operator bias (no information about operator)<br><br>Outcome bias: Technique of image assessment was reported<br><br>Reporting bias (no information about the database)<br><br>Selection bias | Median F/U 40 days (23–190) seems appropriate for primary endpoint, however, heterogeneous and missing exact time points for evaluation of liver volume | 2<br><br>All patients were evaluated | 0<br><br>Not reported | 11/16 |
|                                                   | 2                                                                                                                                                                  |                                                     |                                                          | 0                                                                                                                                 |                                                                                                                                                                                               |                                                                                                                                                         |                                      |                       |       |
| Orcutt 2018, Retrospective cohort study [27]      | Evaluation of RE-induced volume effects<br><br>In primary and secondary liver malignancies and assessment of a model to predict contralateral hypertrophy (n = 25) | 2<br><br>Definitive inclusion criteria were present | 1<br><br>Prospective database (no further details)       | 2<br><br>Volume measurements as absolute (median, range) and relative (mean, median, range) increase                              | Operator bias: one surgical oncologist<br><br>Outcome bias: Technique of image assessment was reported<br><br>Reporting bias (no information about the database)<br><br>Selection bias        | 2<br><br>Evaluation at 1, 3 and 6 months after SIRT seems appropriate                                                                                   | 2<br><br>All patients were evaluated | 0<br><br>Not reported | 11/16 |
|                                                   | 2                                                                                                                                                                  | 2                                                   | 0                                                        | 2                                                                                                                                 | 0                                                                                                                                                                                             | 2                                                                                                                                                       | 2                                    | 0                     | 10/16 |
| Palard 2017, Retrospective cohort study [28]      | Evaluation of RE-induced                                                                                                                                           | Definitive inclusion                                | Not reported                                             | Volume measurements as                                                                                                            | Operator bias (no information about operator)                                                                                                                                                 | Evaluation at 4–8 weeks, then                                                                                                                           | All patients were evaluated          | Not reported          |       |

|                                             |                                                                                                                     |                                            |              |                                                                                                 |                                                          |                                                                                                                                                                                                                |                             |              |       |  |
|---------------------------------------------|---------------------------------------------------------------------------------------------------------------------|--------------------------------------------|--------------|-------------------------------------------------------------------------------------------------|----------------------------------------------------------|----------------------------------------------------------------------------------------------------------------------------------------------------------------------------------------------------------------|-----------------------------|--------------|-------|--|
|                                             | contralateral hypertrophy and its association with dosimetric parameters (n = 73)                                   | criteria were present                      |              | absolute (mean, SD) and relative (mean, SD) increase                                            | Outcome bias: Technique of image assessment was reported | every 12–16 weeks (mean 5.9 ± 3.4 months) after SIRT seems appropriate                                                                                                                                         |                             |              |       |  |
|                                             |                                                                                                                     |                                            |              | Number of resected patients available                                                           | Selection bias                                           |                                                                                                                                                                                                                |                             |              |       |  |
|                                             | 2                                                                                                                   |                                            |              | 2                                                                                               | 0                                                        | Median F/U 15.6 months (4–40.7) after CTx and 7.2 months (0.13–36.4) after surgery seems appropriate for primary endpoint, however, heterogeneous and missing exact time points for evaluation of liver volume |                             |              |       |  |
| Rayar 2015, Retrospective cohort study [29] | Evaluation of systematic chemotherapy-induced and RE-induced secondary surgery in marginally resectable CCC (n = 8) | 2                                          | 0            | Number of resected patients available                                                           | Operator bias (no information about operator)            |                                                                                                                                                                                                                | 2                           | 0            | 10/16 |  |
|                                             |                                                                                                                     | Definitive inclusion criteria were present | Not reported | Secondary Endpoint: Volume measurement as absolute (median, range) and relative (mean) increase | Outcome bias: Technique of image assessment was reported |                                                                                                                                                                                                                | All patients were evaluated | Not reported |       |  |
|                                             |                                                                                                                     |                                            |              |                                                                                                 | Selection bias                                           |                                                                                                                                                                                                                |                             |              |       |  |
|                                             |                                                                                                                     |                                            |              | 2                                                                                               |                                                          |                                                                                                                                                                                                                |                             |              |       |  |
|                                             | 2                                                                                                                   |                                            |              | Volume measurements as absolute (mean, SD) and relative (mean, SD) increase                     | 0                                                        |                                                                                                                                                                                                                |                             |              |       |  |
| Teo 2014, Retrospective cohort study [30]   | Evaluation of RE-induced liver volume changes in HCC and impact of underlying liver disease on hypertrophy (n = 17) | 2                                          | 0            | Subgroup analysis of liver hypertrophy based on underlying liver disease                        | Operator bias: one senior radiologist                    | 2                                                                                                                                                                                                              | 2                           | 0            | 10/16 |  |
|                                             |                                                                                                                     | Definitive inclusion criteria were present | Not reported | Number of resected patients available                                                           | Outcome bias: Technique of image assessment was reported | Mean F/U of 5.7 months (2–12 months) seems appropriate                                                                                                                                                         | All patients were evaluated | Not reported |       |  |
|                                             |                                                                                                                     |                                            |              |                                                                                                 | Selection bias                                           |                                                                                                                                                                                                                |                             |              |       |  |
| Teo 2018, Prospective cohort study          |                                                                                                                     | 2                                          | 2            | 2                                                                                               | 0                                                        |                                                                                                                                                                                                                | 0                           | 0            | 10/16 |  |
|                                             |                                                                                                                     |                                            |              |                                                                                                 |                                                          |                                                                                                                                                                                                                |                             | Not reported |       |  |

|                                                |                                                                                                    |                                            |                                 |                                                                                                           |                                                                                                                                     |                                                                                                                                                            |                                                                                                                                                                        |                       |       |
|------------------------------------------------|----------------------------------------------------------------------------------------------------|--------------------------------------------|---------------------------------|-----------------------------------------------------------------------------------------------------------|-------------------------------------------------------------------------------------------------------------------------------------|------------------------------------------------------------------------------------------------------------------------------------------------------------|------------------------------------------------------------------------------------------------------------------------------------------------------------------------|-----------------------|-------|
| [31]                                           | Evaluation of early RE-induced contralateral liver volume changes in HCC (n = 24)                  | Definitive inclusion criteria were present | Data was prospectively recorded | Volume measurements as absolute (mean, SD, median, range) and relative (mean, SD, median, range) increase | Operator bias: one senior radiologist<br><br>Outcome bias: Technique of image assessment was reported                               | Evaluation at 4–6 weeks and 8–12 weeks after SIRT seems appropriate                                                                                        | n = 2 patients lost to F/U at 8–12 weeks                                                                                                                               |                       |       |
|                                                | 2                                                                                                  |                                            |                                 | Number of resected patients available                                                                     | 0                                                                                                                                   |                                                                                                                                                            |                                                                                                                                                                        |                       |       |
| Theysohn 2014, Retrospective cohort study [32] | Evaluation of RE-induced liver volume changes in HCC with underlying cirrhosis (n = 45)            | Definitive inclusion criteria were present | 0<br><br>Not reported           | Volume measurements as absolute (mean, 95%CI) increase and relative increase (mean)                       | Operator bias: one experienced radiologist<br><br>Outcome bias: Technique of image assessment was reported<br><br>Selection bias    | Evaluation at 1, 3, 6, 9 and 12 months after SIRT seems appropriate                                                                                        | 2<br><br>All patients were evaluated                                                                                                                                   | 0<br><br>Not reported | 10/16 |
|                                                | 2                                                                                                  |                                            |                                 |                                                                                                           | 0                                                                                                                                   |                                                                                                                                                            | 0                                                                                                                                                                      |                       |       |
| Vouche 2013, Retrospective cohort study [33]   | Evaluation of RE-induced liver volume changes in primary and secondary liver malignancies (n = 83) | Definitive inclusion criteria were present | 0<br><br>Not reported           | Volume measurements as absolute (median, range) and relative (median, range) increase                     | Operator bias (no information about operator)<br><br>Outcome bias: Technique of image assessment was reported<br><br>Selection bias | Evaluation at 3–5 weeks, 6–12 weeks, 12–24 weeks, 24–36 weeks, >36 weeks seems appropriate, however, there is a substantial number of patients lost to F/U | Various number of patients lost to F/U at each time point: n = 3 at 3–5 weeks, n = 49 at 6–12 weeks, n = 41 at 12–24 weeks, n = 55 at 24–36 weeks, n = 58 at >36 weeks | 0<br><br>Not reported | 7/16  |

\* Additional criteria for Garlipp et al. (adequate control group (gold standard); contemporary groups (same time interval) – baseline equivalence of groups, adequate statistics).

| Author and year, study design | adequate control group | contemporary groups | Baseline equivalence of groups | Adequate statistics |
|-------------------------------|------------------------|---------------------|--------------------------------|---------------------|
|-------------------------------|------------------------|---------------------|--------------------------------|---------------------|

---

Garlipp 2014, retrospective  
matched-pair analysis  
[23]

2  
PVE is the gold standard

0  
Historic comparison: PVE between 1987-2005  
RE between 2006-2010

2  
Matched-pair

2  
ANOVA

---
